# Supplementary material for: Adaptive migration promotes food web persistence
Source: PubMed Central journal article supplement (PMC6718410; doi:10.1038/s41598-019-49143-8), 2019-09-02
Supplement: 41598_2019_49143_MOESM1_ESM.pdf [file 41598_2019_49143_MOESM1_ESM.pdf]

1 **Supplementary Information**

2

3

4 **Adaptive migration promotes food web persistence**

5

6 **A. Mougi**

7

8

9

10

11

12

13

14

15

16

17

18

19

20

21

22

23

24

25

26

27 **Supplementary Figure S1.** Relationships between spatial coupling strengths ( $M$ ) and stability in  
 28 a random network model; (a) effects of adaptive dispersers ( $p_A$ ) when  $\theta = 50$ ; (b) effects of  
 29 adaptive ability ( $\theta$ ) when  $p_A = 1.0$ .  $N = 20$ ,  $C = 0.5$  and  $H_N = 2$ .

30  
 31  
 32  
 33  
 34

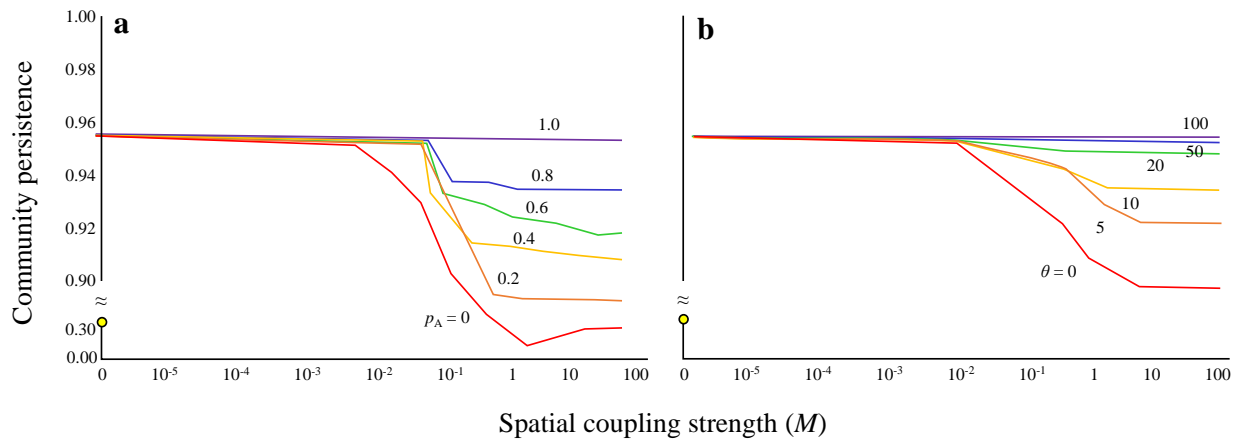

35  
 36  
 37  
 38  
 39  
 40  
 41  
 42  
 43  
 44  
 45

46 **Supplementary Figure S2.** Effects of adaptive ability on local extinction and global persistence;  
47 the proportion of local non-persistence is calculated as  $(1 - \text{the number of times local}$   
48  $\text{populations of all species persist in all patches})/100$  simulation runs. Higher non-persistence  
49 values indicate that local extinction is likely to occur, whereas lower values indicate a high  
50 chance of persistence across habitats. Colours represent different numbers of habitats. The  
51 cascade model is assumed;  $N = 20$ ,  $C = 0.5$ ,  $M = 1.0$  and  $p_A = 1.0$ .

52  
53  
54  
55

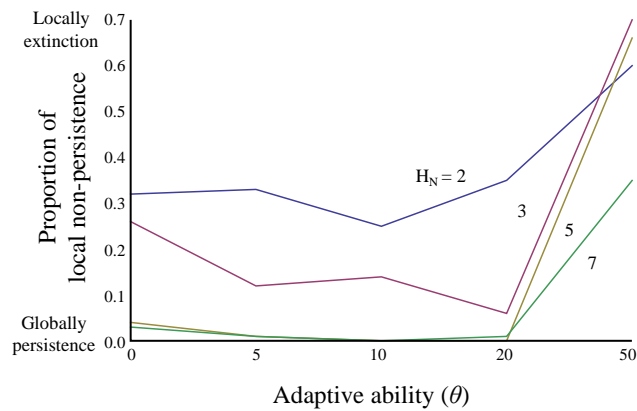

56  
57  
58  
59  
60  
61  
62  
63  
64

65 **Supplementary Figure S3.** Effects of adaptive abilities on dynamic behaviours of community  
 66 systems; (a) mean abundance of all species; (b) mean minimum abundance of all species; a  
 67 sufficiently long simulation run achieved an asymptotic state in which amplitudes (minimum  
 68 densities) of population oscillations for all species did not change over time. Mean densities and  
 69 mean minimum densities of all species across 100 simulation runs. Error bars indicate standard  
 70 deviations. The cascade model is assumed;  $N = 20$ ,  $C = 0.5$ ,  $M = 1.0$  and  $p_A = 1.0$ .

71  
 72  
 73  
 74

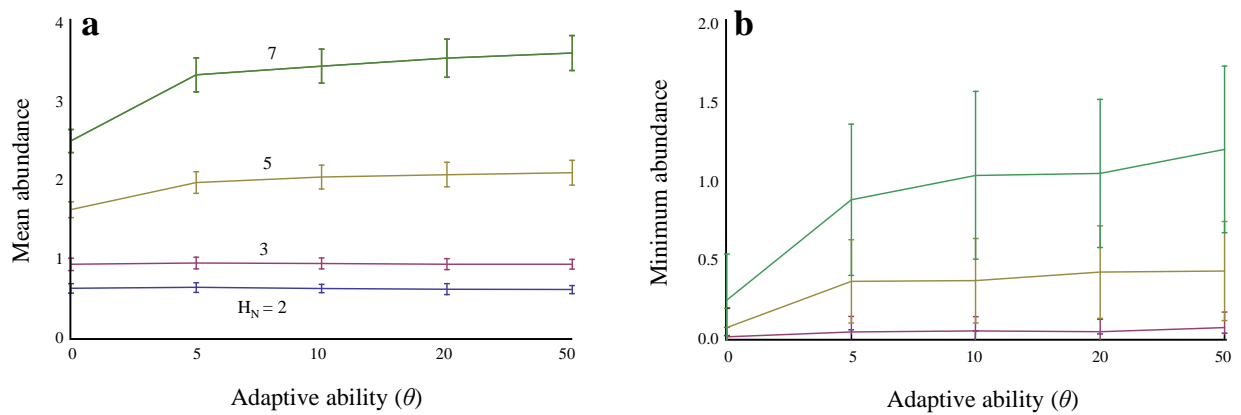

75
